# Supplementary material for: A detailed assessment on the interaction of sodium alginate with a surface-active ionic liquid and a conventional surfactant: a multitechnique approach
Source: Royal Society of Chemistry journal article supplement (doi:10.1039/d2cp00221c), 2022-01-01

## Supplementary Section

### A detailed assessment on the interaction of sodium alginate with a surface-active ionic liquid and a conventional surfactant: a multitechnique approach

Sourav Das, Soumen Ghosh\*

*Centre for Surface Science, Physical Chemistry Section, Department of Chemistry, Jadavpur University, Kolkata 700 032, India*

Corresponding author.

E-mail addresses: [gsoumen70@hotmail.com](mailto:gsoumen70@hotmail.com)

**Table S1. Fitting parameters and lifetimes ( $\tau_1$ ,  $\tau_2$  and  $\langle\tau\rangle$ ) for different time resolved decay plots calculated using IBH DAS-6 software by nonlinear least square iterative method in presence of two different surfactants with their different concentrations in presence and absence of 0.005% (w/v) NaAlg.**

| [NaAlg] = 0.005% (w/v)      |                |                |          |          |                      |          |
|-----------------------------|----------------|----------------|----------|----------|----------------------|----------|
| [C <sub>16</sub> MImCl]/ mM | a <sub>1</sub> | a <sub>2</sub> | $\tau_1$ | $\tau_2$ | $\langle\tau\rangle$ | $\chi^2$ |
| 0                           |                |                | 123.5    |          | 123.5                | 1.05     |
| 0.012                       | 13.5           | 86.5           | 32.57    | 124.8    | 112.3                | 1.06     |
| 0.036                       | 16.9           | 83.0           | 36.07    | 124.8    | 109.8                | 1.01     |
| 0.073                       | 23.1           | 76.9           | 39.14    | 120.6    | 101.8                | 0.99     |
| 0.121                       | 34.4           | 65.6           | 64.38    | 163.9    | 129.6                | 0.99     |
| 0.211                       | 35.2           | 64.8           | 75.76    | 192.3    | 151.3                | 1.01     |
| 0.318                       | 30.4           | 69.6           | 70.39    | 180.6    | 147.1                | 1.13     |
| 0.469                       | 29.7           | 70.3           | 69.44    | 170.9    | 140.7                | 1.08     |
| 0.668                       | 37.6           | 62.3           | 74.51    | 180.5    | 140.6                | 1.03     |
| 0.943                       | 27.9           | 72.0           | 67.64    | 161.9    | 135.5                | 0.95     |
| 1.310                       | 11.1           | 88.9           | 52.62    | 163.8    | 151.5                | 1.06     |
| 1.756                       | 17.1           | 82.9           | 83.42    | 184.7    | 167.4                | 1.06     |
| 2.939                       | 4.38           | 95.6           | 55.35    | 170.4    | 165.4                | 1.03     |
| 3.690                       | 9.17           | 90.8           | 81.80    | 175.3    | 166.7                | 0.99     |
| 4.510                       | 3.18           | 96.8           | 40.71    | 170.3    | 166.2                | 1.02     |
| 5.353                       | 6.96           | 93.0           | 82.24    | 174.1    | 167.7                | 1.02     |
| [NaAlg] = 0.005% (w/v)      |                |                |          |          |                      |          |
| [C <sub>16</sub> TPB]/ mM   | a <sub>1</sub> | a <sub>2</sub> | $\tau_1$ | $\tau_2$ | $\tau_{av}$          | $\chi^2$ |
| 0                           |                |                | 123.5    |          | 123.5                | 1.05     |
| 0.005                       | 6.80           | 93.2           | 16.89    | 125.9    | 118.5                | 1.03     |
| 0.017                       | 20.6           | 79.4           | 21.50    | 123.3    | 102.3                | 1.01     |
| 0.032                       | 37.6           | 62.4           | 27.43    | 118.8    | 84.38                | 1.01     |
| 0.058                       | 52.2           | 47.8           | 29.65    | 113.3    | 69.65                | 1.05     |
| 0.097                       | 65.8           | 34.2           | 32.04    | 106.3    | 57.47                | 1.05     |
| 0.146                       | 71.3           | 28.7           | 32.11    | 82.93    | 46.72                | 1.12     |
| 0.232                       | 74.1           | 25.9           | 33.14    | 71.71    | 43.15                | 1.14     |

|       |      |      |       |       |       |      |
|-------|------|------|-------|-------|-------|------|
| 0.338 | 74.9 | 25.0 | 32.05 | 70.67 | 41.72 | 0.95 |
| 0.446 | 80.3 | 19.7 | 32.14 | 54.52 | 36.54 | 1.06 |
| 0.555 | 53.9 | 46.1 | 25.80 | 47.49 | 35.79 | 1.09 |
| 0.695 | 74.4 | 25.6 | 27.72 | 54.82 | 34.65 | 1.06 |
| 0.852 | 24.2 | 75.8 | 18.55 | 35.59 | 31.46 | 1.16 |
| 1.025 | 79.0 | 20.9 | 26.81 | 64.89 | 34.79 | 1.03 |
| 1.220 | 11.4 | 88.6 | 17.47 | 31.60 | 29.98 | 0.97 |
| 1.424 | 74.1 | 25.9 | 26.31 | 42.58 | 30.52 | 1.05 |
| 1.707 | 8.98 | 91.0 | 10.27 | 30.57 | 28.75 | 1.09 |
| 1.965 | 11.9 | 88.0 | 12.61 | 31.34 | 29.09 | 1.11 |
| 2.274 | 12.5 | 87.5 | 19.99 | 29.84 | 28.60 | 1.08 |

**Table S2. Coefficients of A, B<sub>1</sub> and B<sub>2</sub> values derived from the fitting of  $Y = A + B_1 \cdot X + B_2 \cdot X^2$  of  $\gamma$  vs. log [surfactant] plots given in Fig. S3.**

| [NaAlg]<br>% w/v | C <sub>16</sub> TPB |                |                | C <sub>16</sub> MImCl |                |                |
|------------------|---------------------|----------------|----------------|-----------------------|----------------|----------------|
|                  | A                   | B <sub>1</sub> | B <sub>2</sub> | A                     | B <sub>1</sub> | B <sub>2</sub> |
| 0                | 30.4                | -8.67          | 1.16           | 34.8                  | -19.8          | -3.94          |
| 0.001            | 41.8                | 7.78           | 5.12           | 37.5                  | -7.55          | -0.004         |
| 0.005            | 43.2                | -1.06          | 3.00           | 39.9                  | -16.6          | -1.72          |
| 0.01             | 61.9                | 7.49           | 4.86           | 50.8                  | -15.6          | -2.53          |

**Fig. S1. Plot of reduced viscosity (cm<sup>3</sup>/gm) vs. concentration of alginate (gm/ml) at 298.15 K at a fixed NaCl concentration (0.1 M) #**

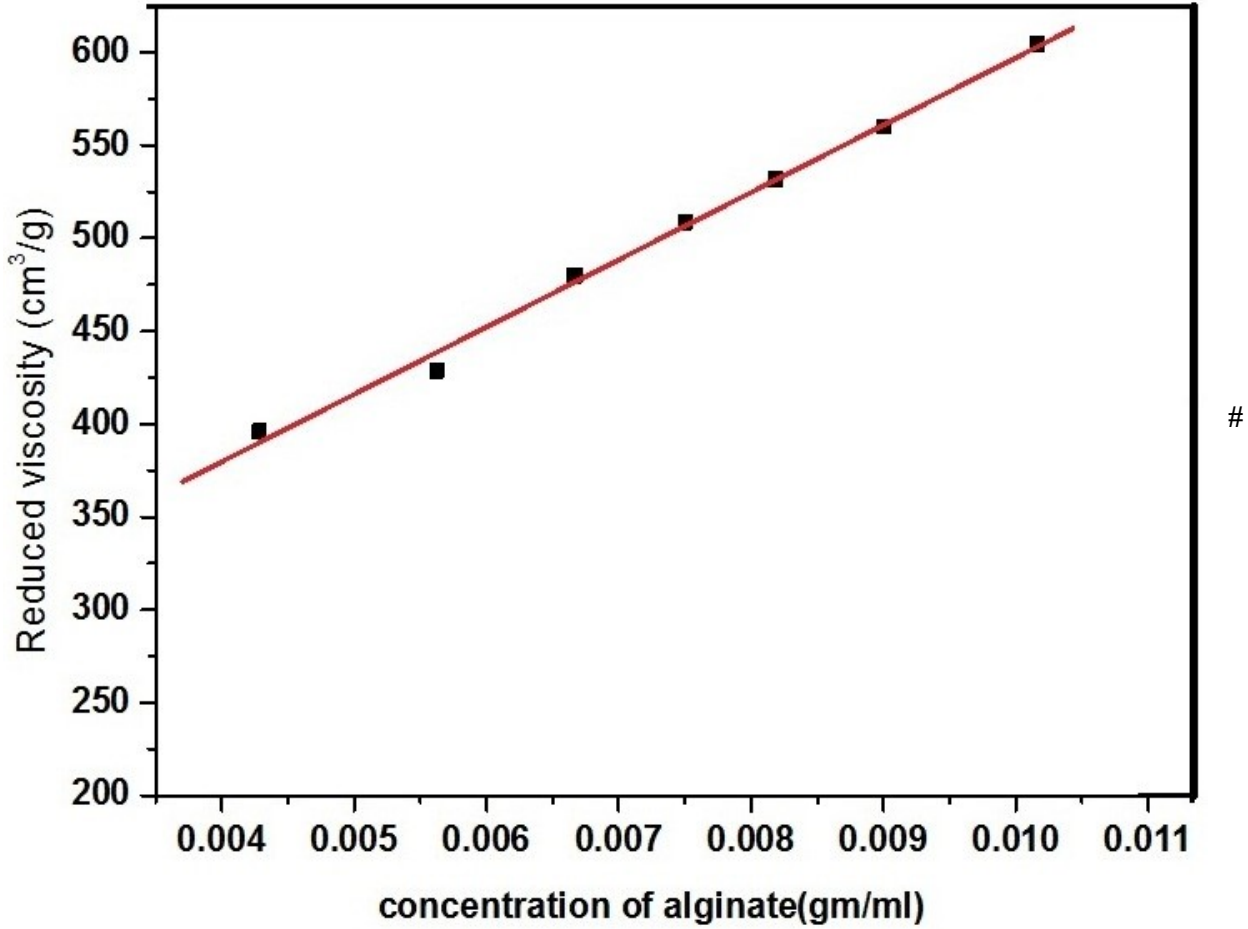

Intrinsic viscosity  $[\eta]$  of a polyelectrolyte can be determined in salt medium using Huggins equation:

$$\frac{\eta_{sp}}{C_p} = [\eta] + k_H[\eta]^2 C_p$$

where,  $\eta_{sp}$  is the specific viscosity and  $C_p$  is the concentration of NaAlg (gm/ml).  $k_H$  is the

Huggins constant.  $\frac{\eta_{sp}}{C_p}$ , termed as reduced viscosity in  $\text{cm}^3/\text{g}$  unit. A stock NaAlg solution was prepared in 0.1 M NaCl solution and progressively added to a 0.1 M NaCl solution taken in an ubbelohde viscometer fitted in a thermostatic water bath at 298.15 K and flow times were measured in triplicate after each addition of stock NaAlg. Reduced viscosity vs. concentration of alginate was plotted (shown in above). Intrinsic viscosity determined for NaAlg is  $235 \text{ cm}^3/\text{gm}$  at 298.15 K and 0.01 M NaCl medium. Average viscometric molecular weight ( $M_v$ ) of NaAlg was determined using Mark–Houwink equation:

$$[\eta] = K M_v^\alpha$$

K and  $\alpha$  are constants and characteristic of the medium, temperature and polymer. K and  $\alpha$  values are taken from Clementi *et. al.* [41], and Masuelli M. A. *et al.* [42].  $K = 0.0023 \text{ cm}^3 / \text{gm}$  ,  $\alpha = 0.984$ .

**Fig.S2. Plot of % Intensity vs. hydrodynamic diameter of pure NaAlg (0.01% w/v) and with varying the concentrations of C<sub>16</sub>MImCl (A) and C<sub>16</sub>TPB (B) added to it. Concentrations of surfactants have been shown at the bottom of each plot. PDI values are given within a bracket beside each figure caption.**

**A**

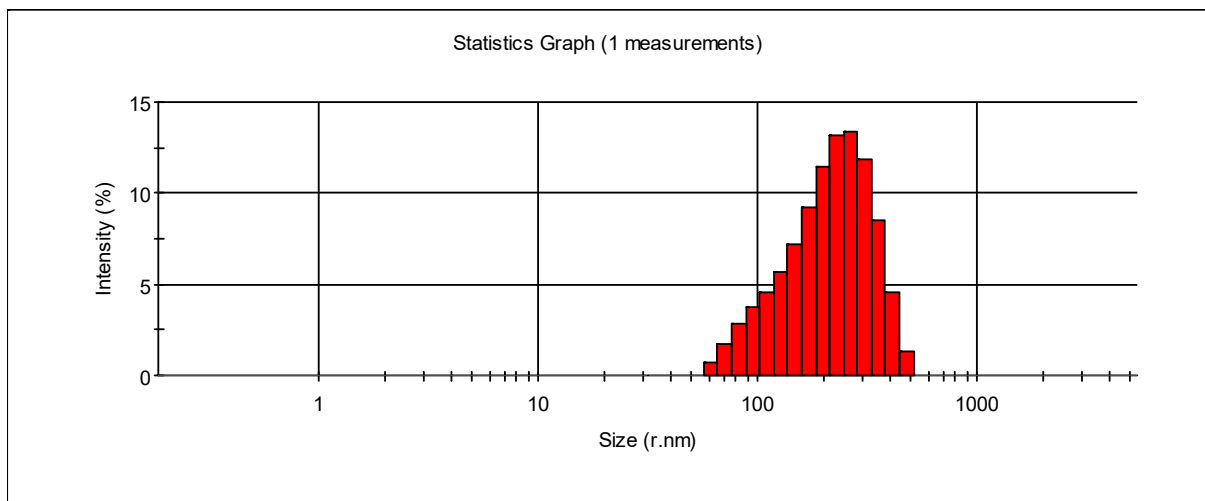

**Free NaAlg 0.01% (PDI = 0.668)**

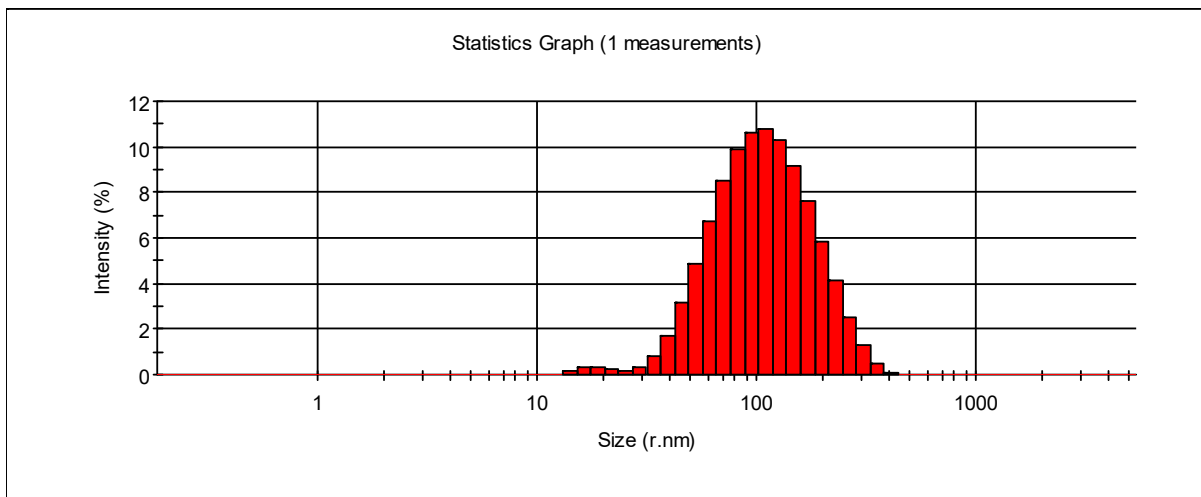

**NaAlg 0.01% + 0.09 mM C<sub>16</sub>MImCl (PDI = 0.218)**

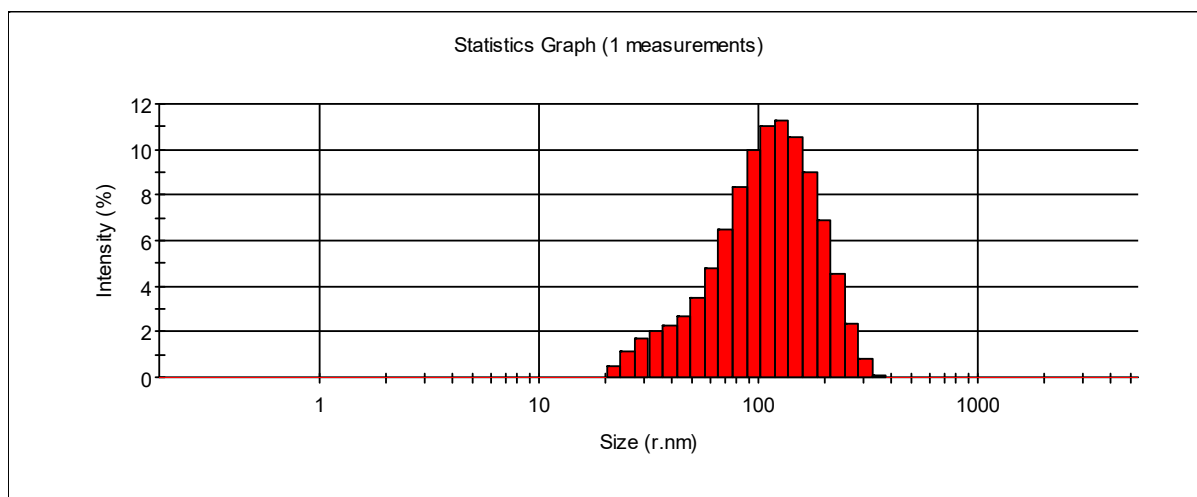

**NaAlg 0.01% + 0.30 mM C<sub>16</sub>MImCl (PDI = 0.221)**

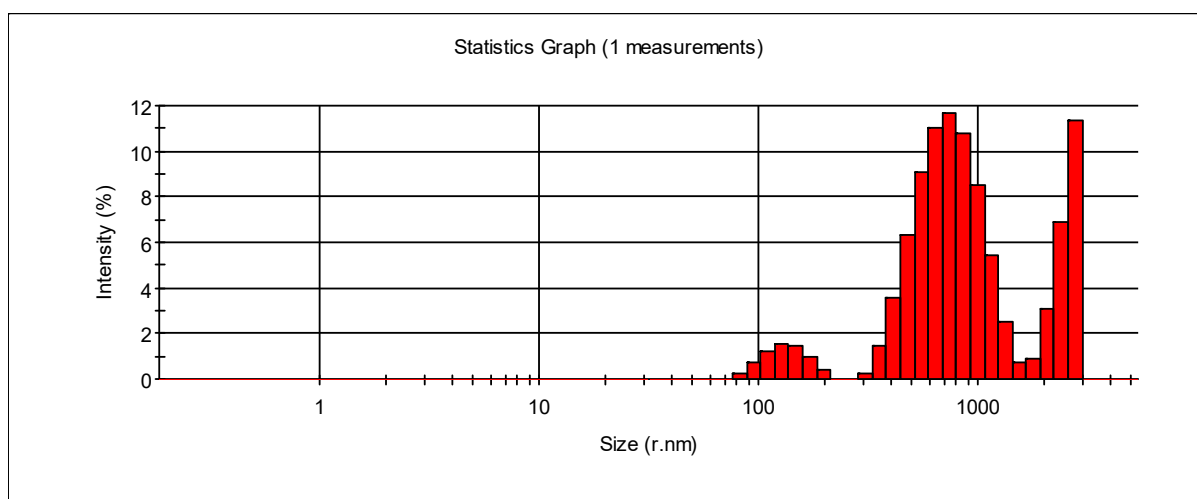

**NaAlg 0.01% + 1.42 mM C<sub>16</sub>MImCl (PDI = 0.470)**

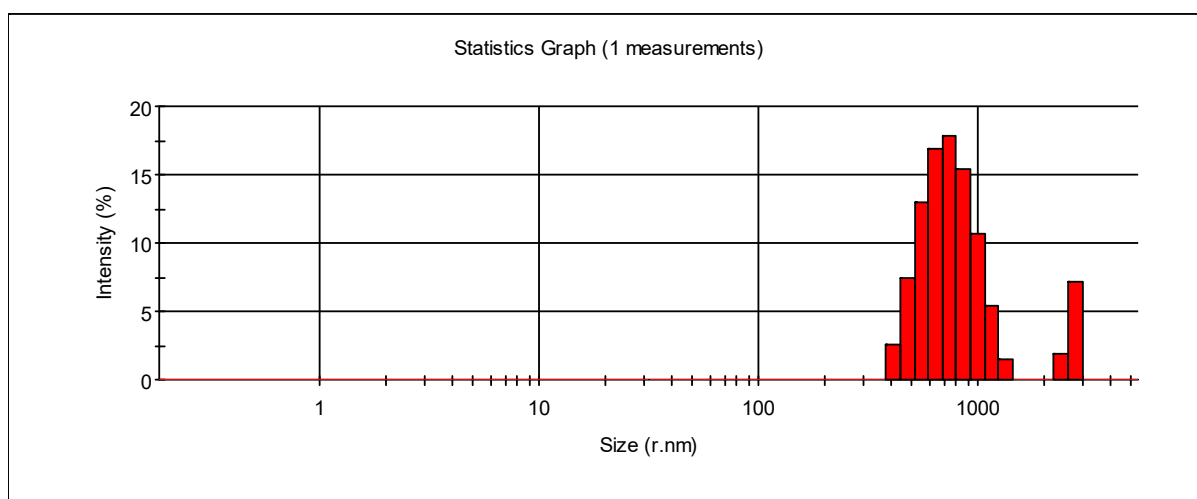

**NaAlg 0.01% + 3.32 mM C<sub>16</sub>MImCl (0.490)**

**B**

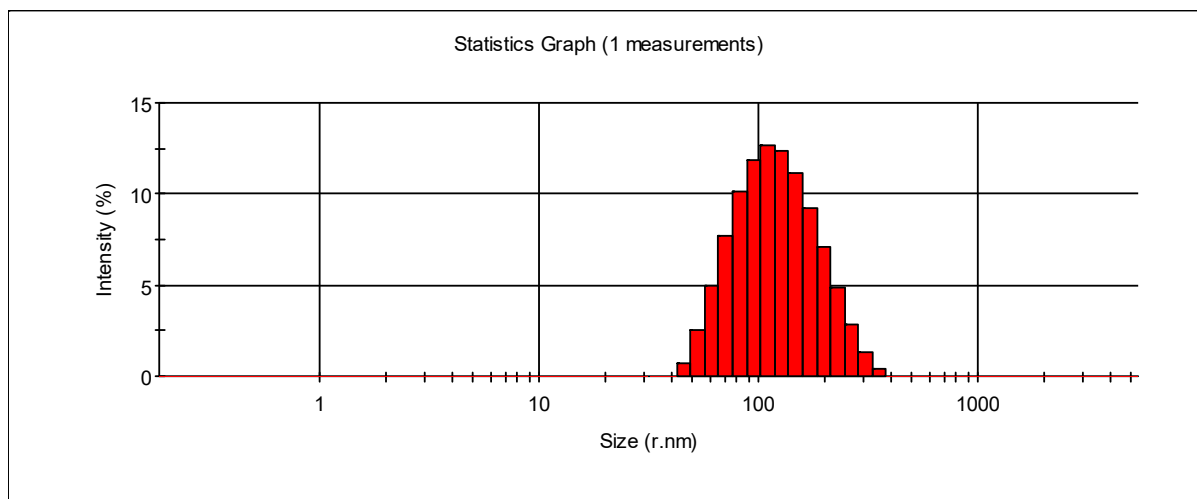

**NaAlg 0.01% + 0.05 mM C<sub>16</sub>TPB (PDI = 0.184)**

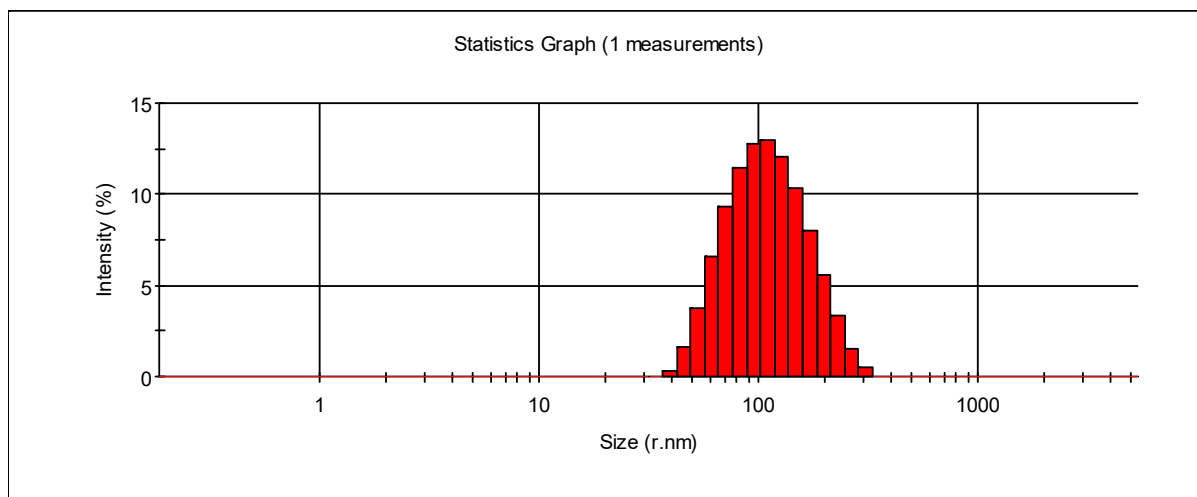

**NaAlg 0.01% + 0.18 mM C<sub>16</sub>TPB (PDI = 0.186)**

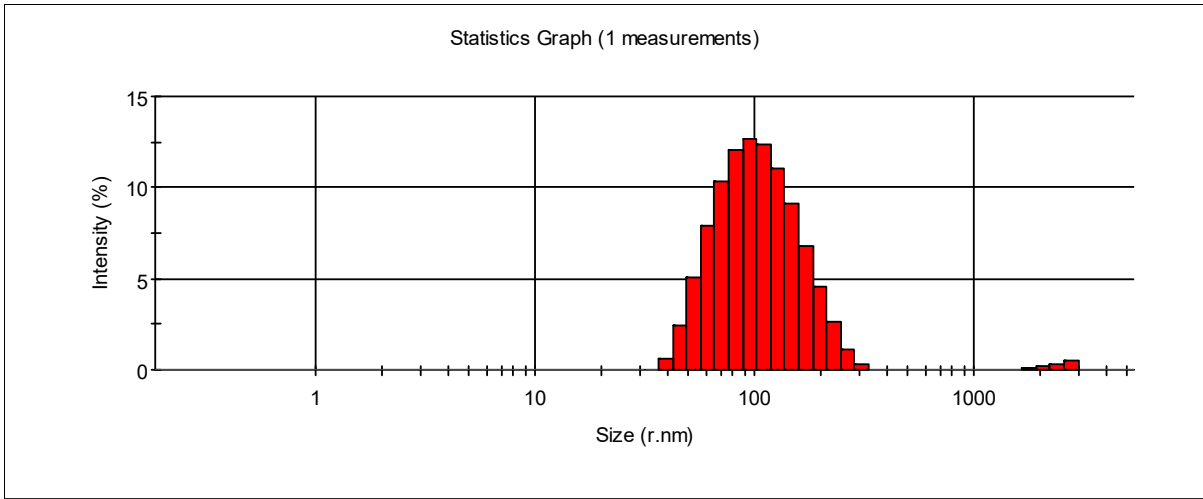

**NaAlg 0.01% + 0.89 mM C16TPB (PDI = 0.197)**

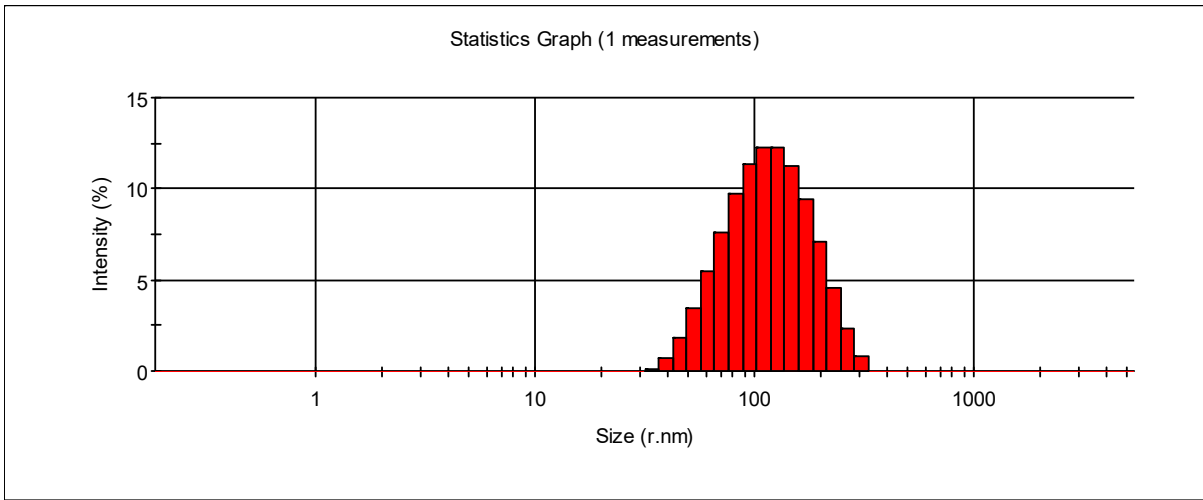

**NaAlg 0.01% + 1.95 mM C16TPB (PDI = 0.150)**

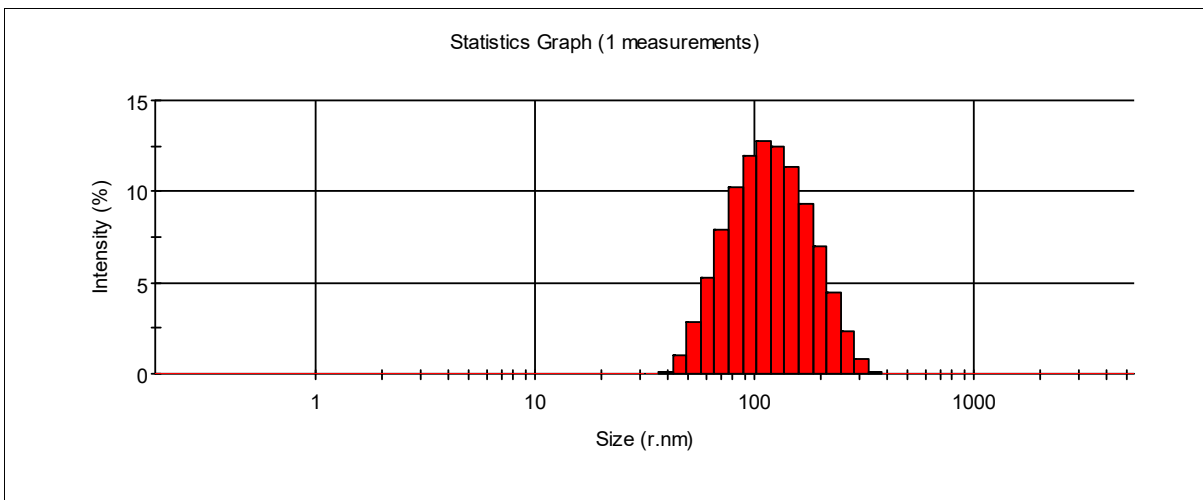

**NaAlg 0.01% + 2.33 mM C16TPB (PDI = 0.181)**

**Fig. S3.  $\gamma$  with corresponding  $\log[\text{surfactant}]$  values up to  $\text{cmc} / C_m^*$  and fitted them with second order polynomials [a: free  $C_{16}\text{MImCl}$ , b: free  $C_{16}\text{TPB}$ , c:  $C_{16}\text{MImCl} + 0.001\%$  (w/v) NaAlg, d:  $C_{16}\text{MImCl} + 0.005\%$  (w/v) NaAlg, e:  $C_{16}\text{MImCl} + 0.01\%$  (w/v) NaAlg, f:  $C_{16}\text{TPB} + 0.001\%$  (w/v) NaAlg, g:  $C_{16}\text{TPB} + 0.005\%$  (w/v) NaAlg, h:  $C_{16}\text{TPB} + 0.01\%$  (w/v) NaAlg]**

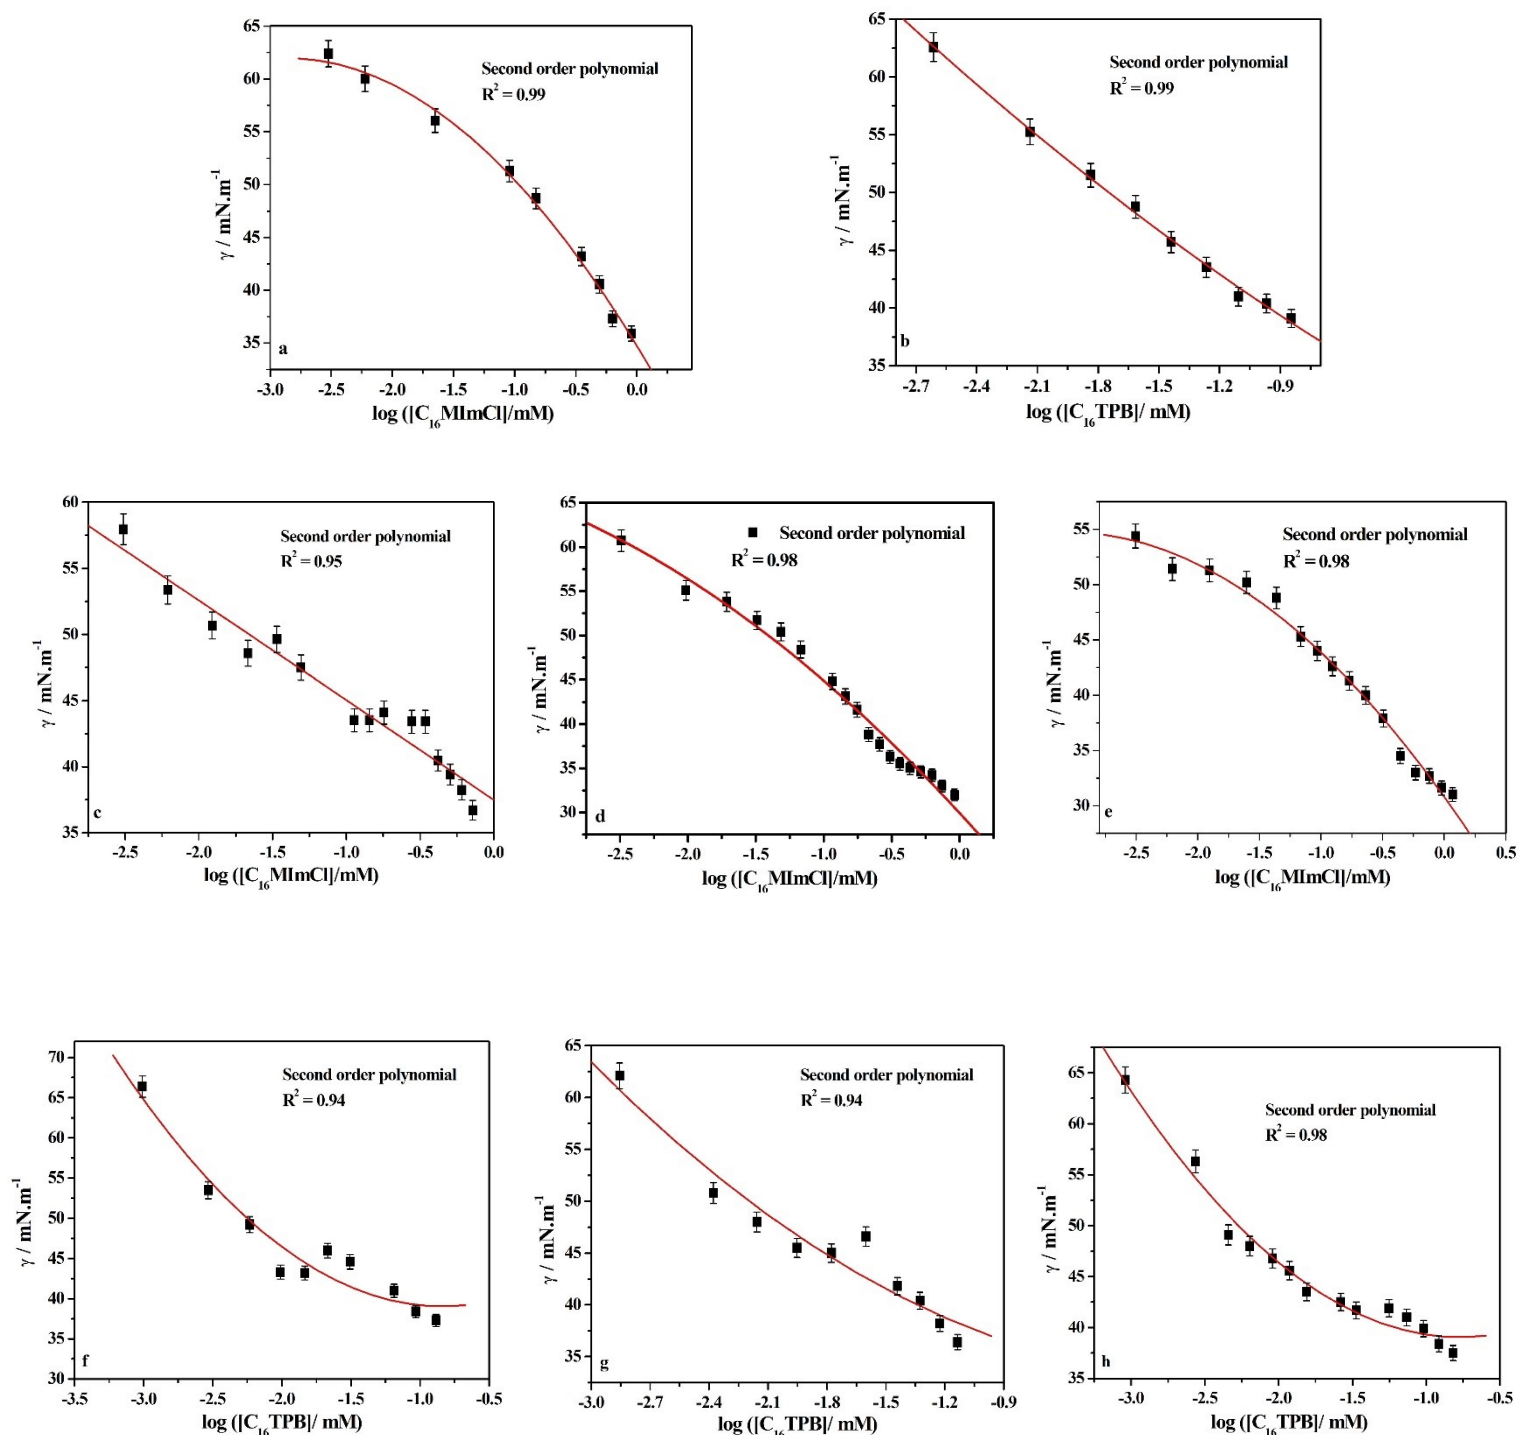



Fig. S4.  $\ln(I_0/I)$  vs. [CPC] in presence of two different surfactants in presence and absence of NaAlg with varying wt %. Surfactant concentrations have been fixed to  $\sim 10$  mM for each system showing in the legend.

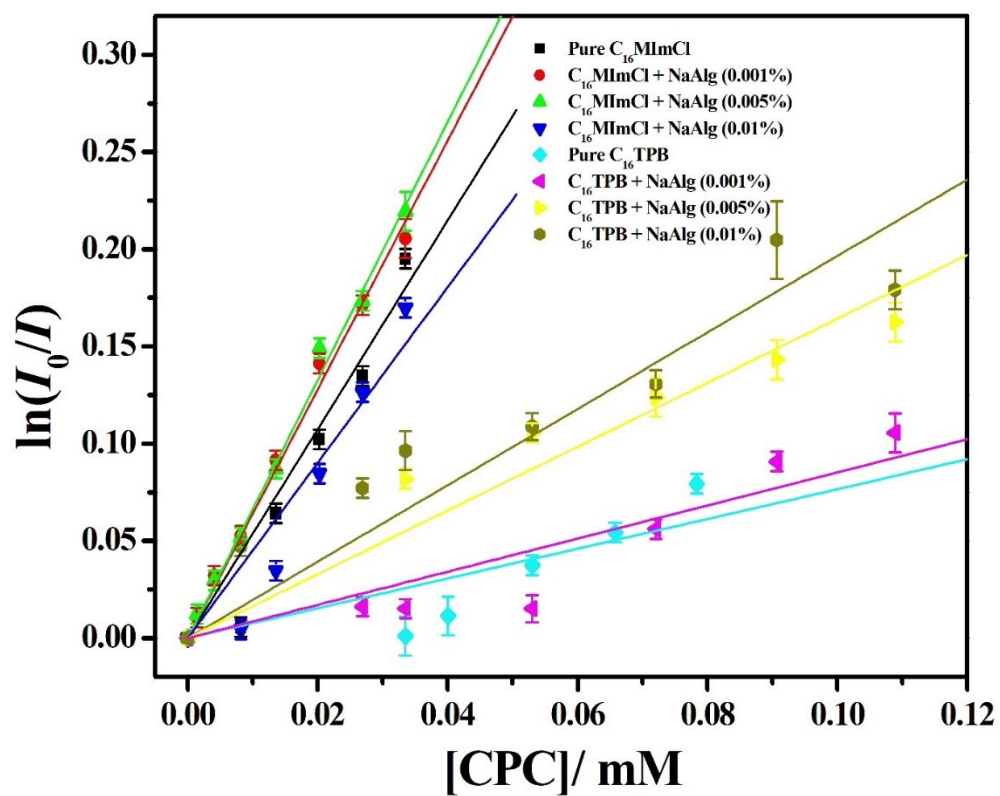

Supplement: d2cp00221c1.pdf [file d2cp00221c1.pdf]
